# Supplementary material for: Development of Europium-Sensitized Fluorescence-Based Method for Sensitive Detection of Oxytetracycline in Citrus Tissues
Source: MDPI journal article supplement (doi:10.3390/antibiotics10020224), 2021-02-23
Supplement: s1 [file s1]

Table S1. The level of OTC ( $\mu\text{g g}^{-1}$  FW) in trunk-injected trees 24 and 96 hr post-injection as obtained by the europium and ELISA assay.

| 24 hr post-injection |          |
|----------------------|----------|
| ELISA                | Europium |
| 157.1                | 95.0     |
| 142.3                | 107.8    |
| 220.0                | 94.2     |
| 96 hr post-injection |          |
| ELISA                | Europium |
| 160.3                | 75.48    |
| 90.2                 | 77.8     |
| 191.5                | 67.0     |
| 101.6                | 80.8     |

OTC was extracted using the HCl and trichloroacetic acid mixture and cleaned using HLB cartridge before being analyzed using the europium assay. The acidic extract was diluted (1:100) using distilled water, and then (1:4) using the dilution buffer provided by the kit and analyzed directly without any cleanup.
